# Supplementary material for: SARS-CoV-2 Pattern Provides a New Scoring System and Predicts the Prognosis and Immune Therapeutic Response in Glioma
Source: MDPI journal article supplement (doi:10.3390/cells11243997), 2022-12-10
Supplement: s1 [file s1]

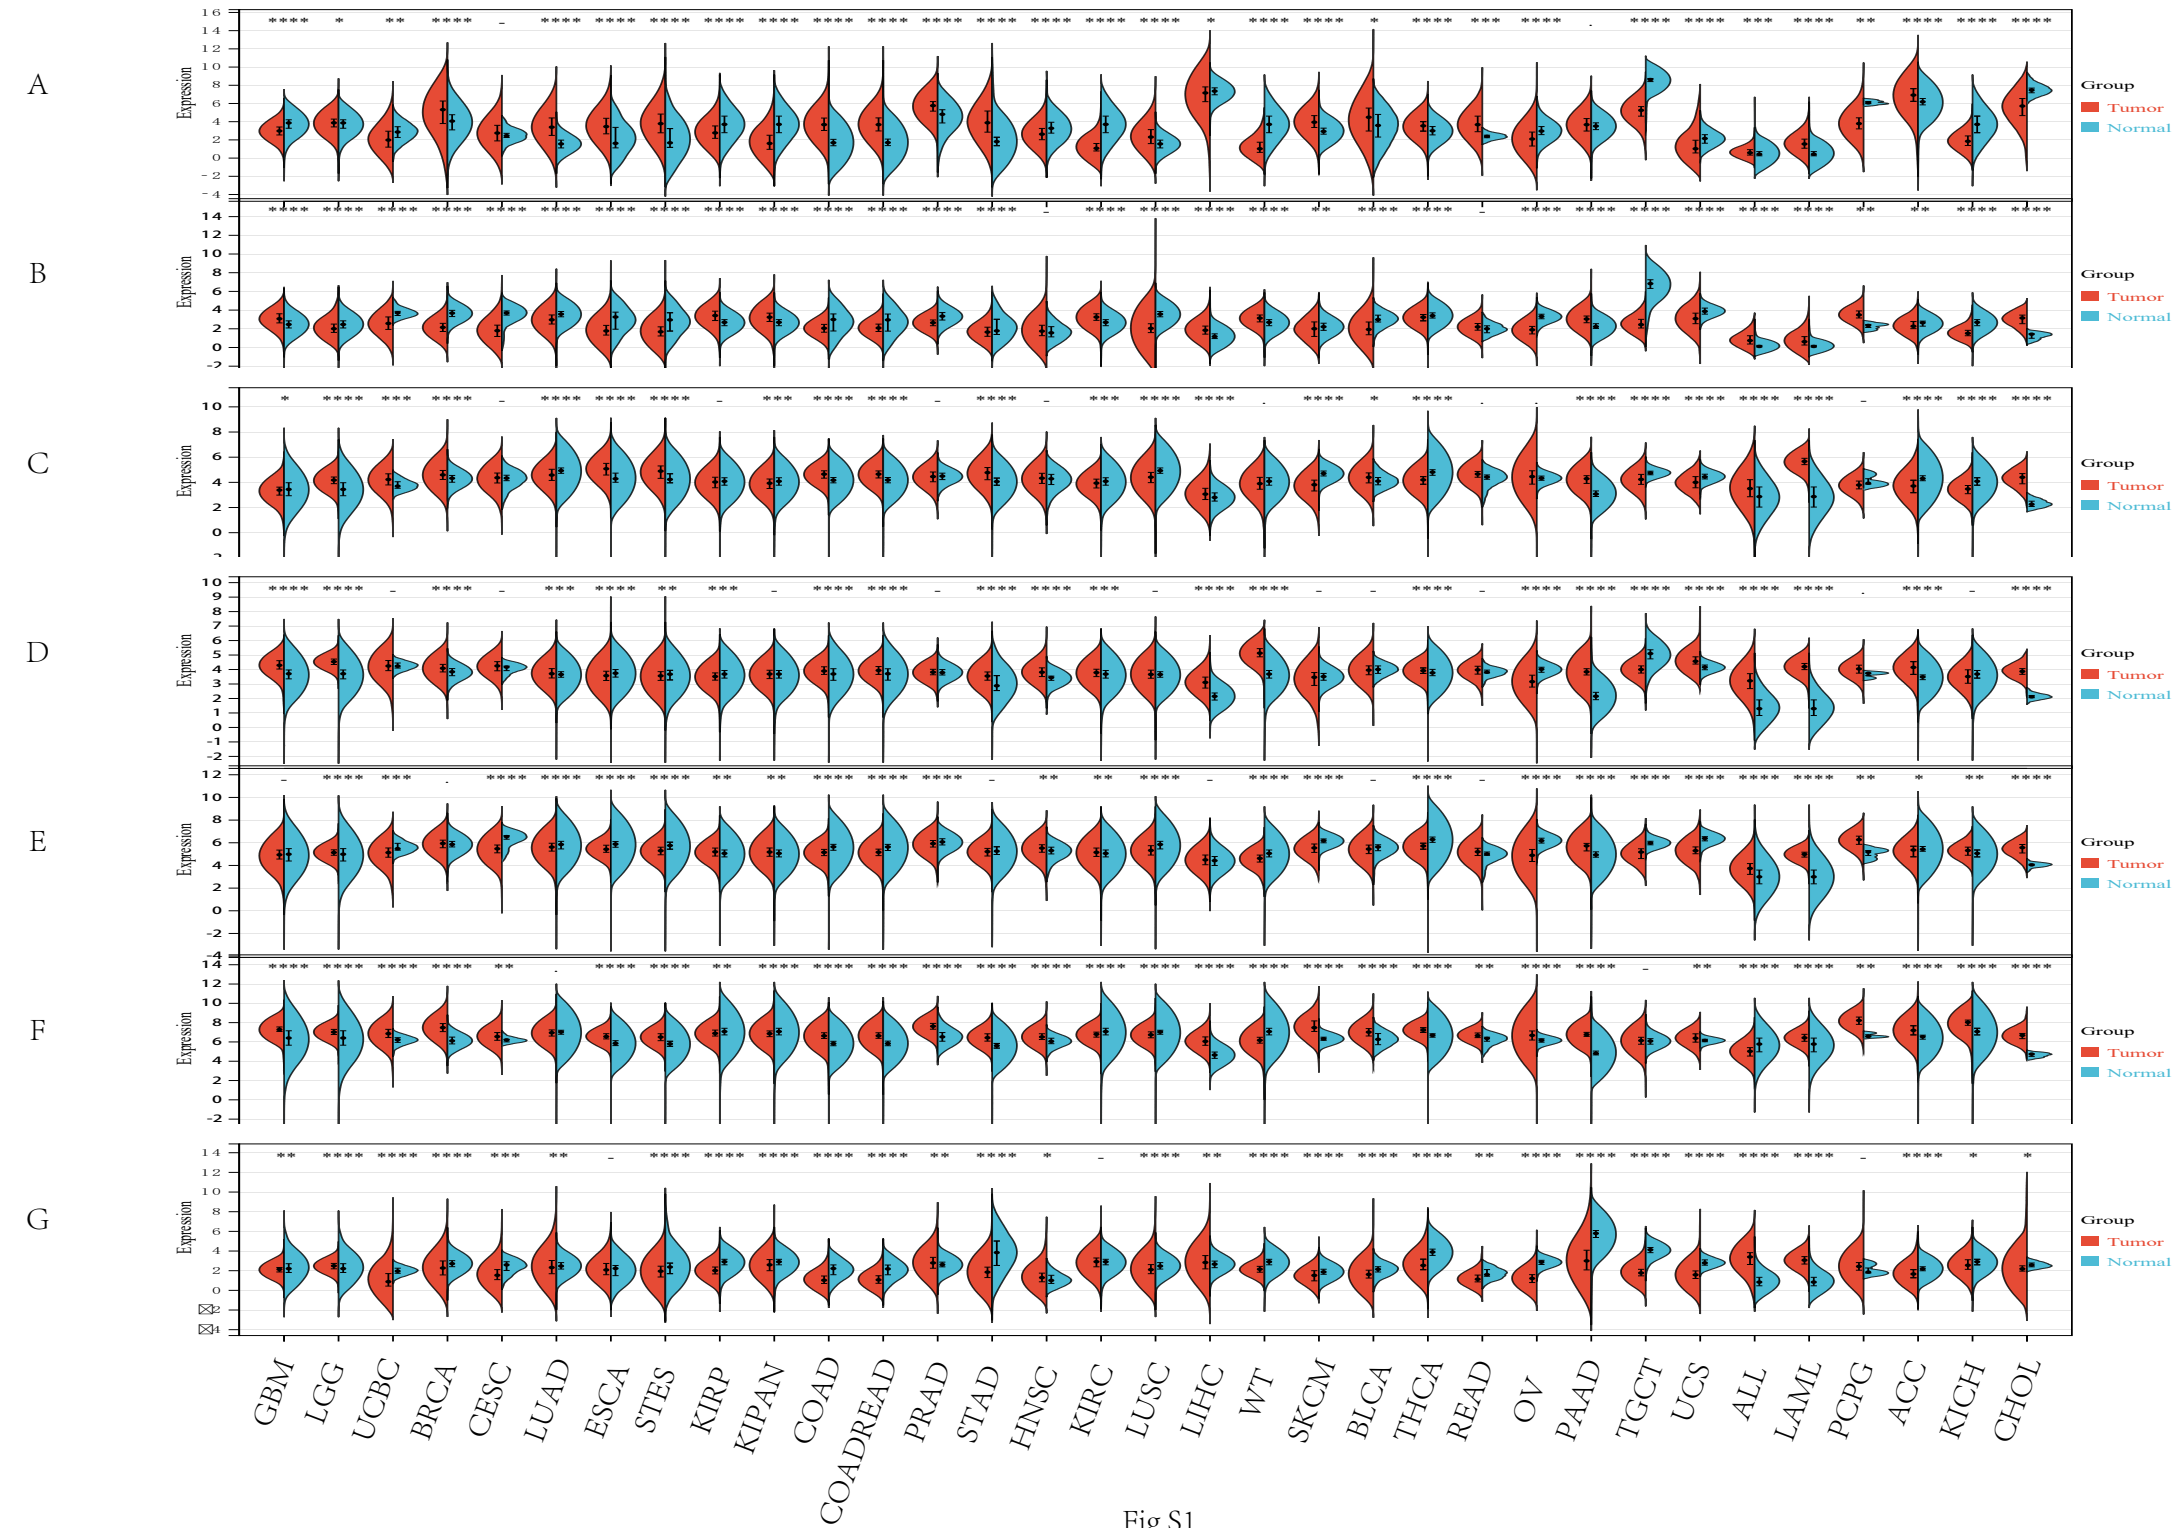

Fig S1

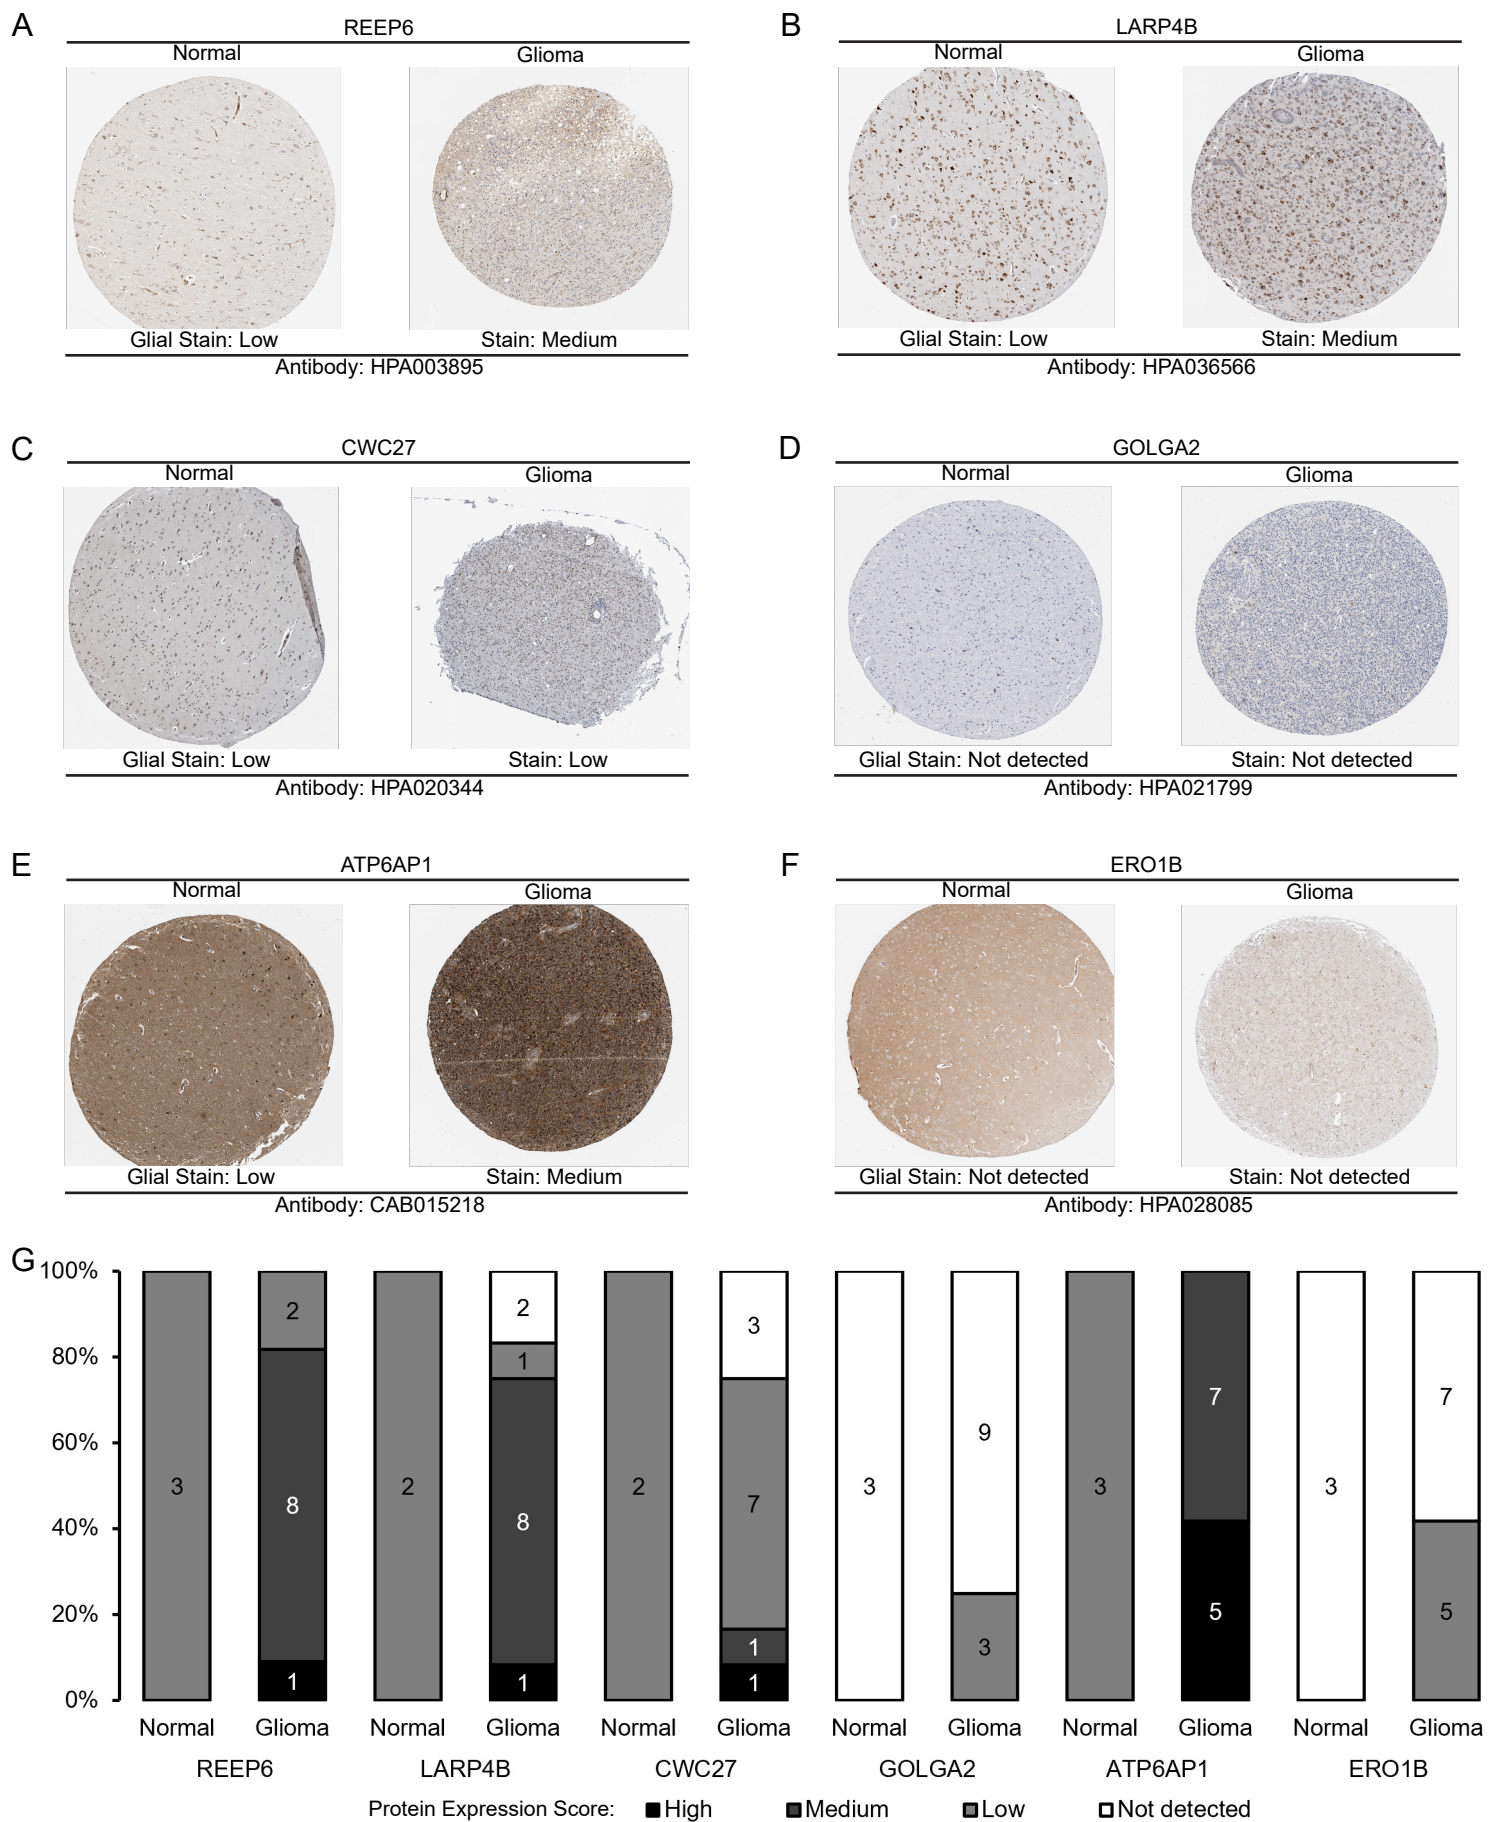

Fig S2



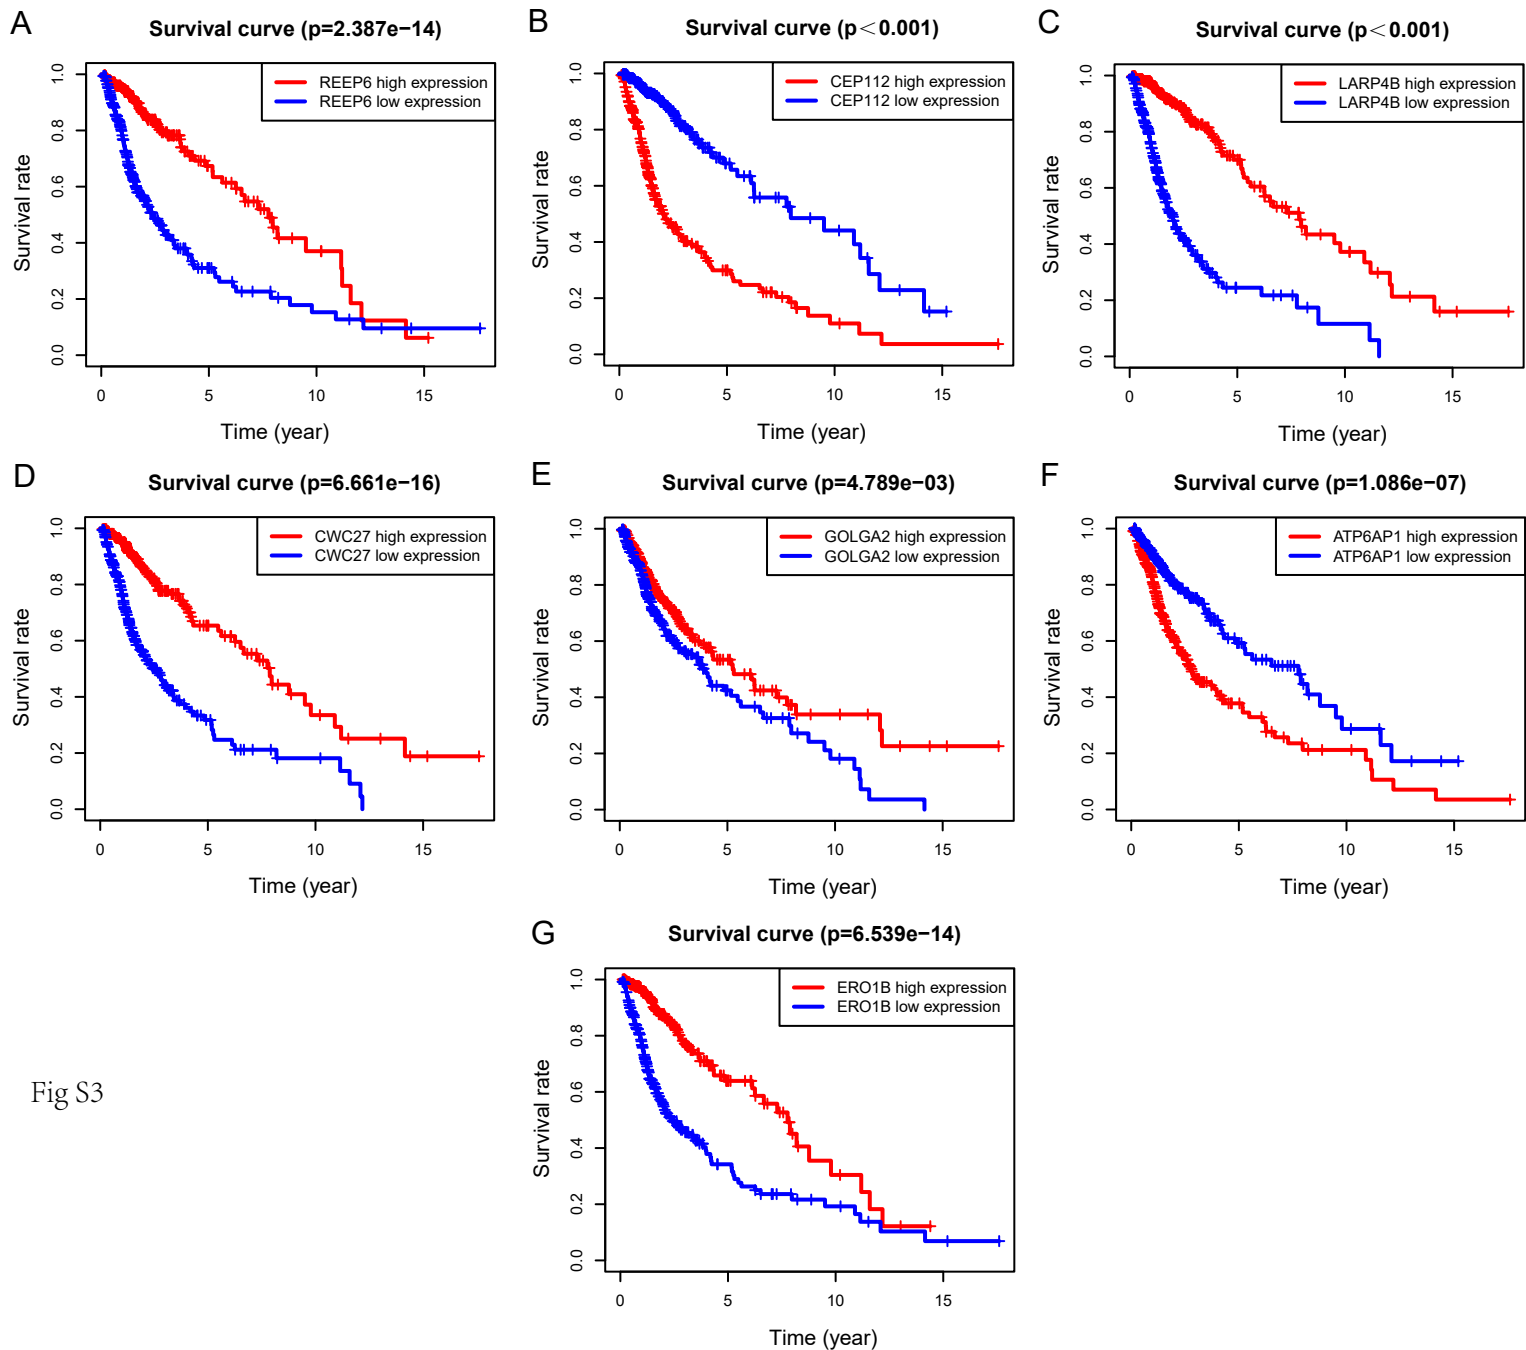

Fig S3

**Table S1.** Sequences of primers

| Gene    | Primer   | Sequence                |
|---------|----------|-------------------------|
| REEP6   | Forwards | GGGTGGAGAAGCGGTATCTG    |
|         | Reverse  | TCCGATGAGATTGCACAGCAG   |
| CEP112  | Forwards | GGCGGCTCCAGGATGTTAG     |
|         | Reverse  | CAAGTTCTTGTCTTAGGGATGCT |
| LARP4B  | Forwards | AGGACGCTAAGGTTGTGGC     |
|         | Reverse  | GGTGGGATGGAACTTGTCTGA   |
| CWC27   | Forwards | GCCTGGTTTCATAGTCCAAGG   |
|         | Reverse  | TGAATGGCGCTCCATAGATAGA  |
| GOLGA2  | Forwards | CCCGCGATGTCGGAAGAAA     |
|         | Reverse  | GCATTGTCCTTGGGTGTATCCT  |
| ATP6AP1 | Forwards | CAGCGACTTGCAGCTCTCTAC   |
|         | Reverse  | TGAAATCCTCAATGCTCAGCTTG |
| ERO1B   | Forwards | TTCTGGATGATTGCTTGTGTGAT |
|         | Reverse  | GGTCGCTTCAGATTAACTTGT   |
